# Supplementary material
Source: PubMed Central journal article supplement (PMC8373461)
Supplement: 10-1055-s-0041-1733908-s210055ra.pdf [file 10-1055-s-0041-1733908-s210055ra.pdf]

**Supplementary Material 1** Distribution of predictors in the original sample versus the contemporary sample, and whether those predictors were included in the final previously published models.

| Predictor                  | Mental health specialty sample |                            |                                   |             | General medical sample     |                            |                                   |             |
|----------------------------|--------------------------------|----------------------------|-----------------------------------|-------------|----------------------------|----------------------------|-----------------------------------|-------------|
|                            | Original                       | Contemporary               | Included <sup>a</sup> in suicide: |             | Original                   | Contemporary               | Included <sup>a</sup> in suicide: |             |
|                            | n = 10,275,853<br>Mean or %    | N = 6,832,439<br>Mean or % | Attempt model                     | Death model | N = 9,685,206<br>Mean or % | N = 3,987,078<br>Mean or % | Attempt model                     | Death model |
| Age                        | 42.4                           | 43.1                       | x                                 | x           | 49.6                       | 50.2                       | x                                 | x           |
| ac1                        | 10.0 %                         | 9.2 %                      | x                                 | x           | 4.0 %                      | 4.4 %                      | x                                 |             |
| ac2                        | 16.9 %                         | 17.9 %                     |                                   |             | 13.0 %                     | 13.6 %                     |                                   |             |
| ac3                        | 26.1 %                         | 25.9 %                     | x                                 |             | 21.3 %                     | 20.8 %                     | x                                 |             |
| ac4                        | 36.7 %                         | 33.8 %                     | x                                 |             | 39.2 %                     | 35.0 %                     | x                                 |             |
| ac5                        | 10.3 %                         | 13.2 %                     | x                                 |             | 22.5 %                     | 26.2 %                     |                                   |             |
| Not Enrolled               | 2.5 %                          | 0.0 %                      |                                   |             | 1.7 %                      | 0.0 %                      |                                   |             |
| Medicaid                   | 4.3 %                          | 10.5 %                     |                                   |             | 6.4 %                      | 11.9 %                     | x                                 |             |
| commercial                 | 75.7 %                         | 69.0 %                     | x                                 |             | 66.7 %                     | 57.3 %                     | x                                 |             |
| Privatepay                 | 12.5 %                         | 16.6 %                     | x                                 |             | 17.2 %                     | 19.2 %                     |                                   |             |
| Statesubsidized            | 0.4 %                          | 0.2 %                      |                                   |             | 0.6 %                      | 0.4 %                      |                                   |             |
| Selffunded                 | 3.1 %                          | 3.4 %                      |                                   |             | 2.9 %                      | 4.0 %                      | x                                 |             |
| Medicare                   | 14.5 %                         | 17.7 %                     | x                                 | x           | 24.9 %                     | 30.4 %                     |                                   | x           |
| Highdeductible             | 7.4 %                          | 10.8 %                     |                                   |             | 6.9 %                      | 8.5 %                      | x                                 |             |
| First_visit                | 7.0 %                          | 3.7 %                      |                                   |             | 23.1 %                     | 15.4 %                     |                                   |             |
| Days_since_prev            | 40                             | 57                         | x                                 | x           | 121                        | 200                        | x                                 | x           |
| Female                     | 62.3 %                         | 64.5 %                     | x                                 | x           | 61.5 %                     | 63.8 %                     | x                                 | x           |
| dep_dx_pre5y_no_cumulative | 71.2 %                         | 73.9 %                     |                                   |             | 49.8 %                     | 58.7 %                     | x                                 |             |
| dep_dx_pre5y               | 48.1 %                         | 50.1 %                     | x                                 | x           | 39.4 %                     | 46.8 %                     | x                                 |             |
| anx_dx_pre5y_no_cumulative | 59.8 %                         | 76.7 %                     |                                   |             | 41.4 %                     | 60.1 %                     |                                   |             |
| anx_dx_pre5y               | 39.2 %                         | 51.3 %                     | x                                 | x           | 31.2 %                     | 45.5 %                     | x                                 |             |
| bip_dx_pre5y_no_cumulative | 13.1 %                         | 12.3 %                     |                                   |             | 5.6 %                      | 5.7 %                      |                                   |             |

Supplementary Material 1 (Continued)

| Predictor                   | Description                                | Mental health specialty sample |           |              |           | General medical sample |           |              |           |   |  |
|-----------------------------|--------------------------------------------|--------------------------------|-----------|--------------|-----------|------------------------|-----------|--------------|-----------|---|--|
|                             |                                            | Original                       |           | Contemporary |           | Original               |           | Contemporary |           |   |  |
|                             |                                            | n                              | Mean or % | N            | Mean or % | N                      | Mean or % | N            | Mean or % |   |  |
|                             |                                            | 10,275,853                     | 9.6%      | 6,832,439    | 9.0%      | 9,685,206              | 4.4%      | 3,987,078    | 4.3%      |   |  |
|                             |                                            |                                |           |              |           |                        |           |              |           |   |  |
| bip_dx_pre5y                | Bipolar DX, [1,5] years prior              |                                | 9.6%      |              | 9.0%      |                        | 4.4%      |              | 4.3%      | x |  |
| sch_dx_pre5y_noi_cumulative | Schizophrenia DX, (0,5] years prior        |                                | 3.6%      |              | 4.3%      |                        | 1.6%      |              | 1.7%      |   |  |
| sch_dx_pre5y                | Schizophrenia DX, [1,5] years prior        |                                | 2.8%      |              | 3.3%      |                        | 1.3%      |              | 1.4%      |   |  |
| oth_dx_pre5y_noi_cumulative | Other Psychosis DX, (0,5] years prior      |                                | 5.0%      |              | 5.8%      |                        | 2.8%      |              | 3.1%      |   |  |
| oth_dx_pre5y                | Other psychosis DX, [1,5] years prior      |                                | 3.0%      |              | 3.6%      |                        | 1.9%      |              | 2.1%      |   |  |
| dem_dx_pre5y_noi_cumulative | Dementia DX, (0,5] years prior             |                                | 3.8%      |              | 1.4%      |                        | 4.2%      |              | 2.8%      |   |  |
| dem_dx_pre5y                | Dementia DX, [1,5] years prior             |                                | 2.4%      |              | 0.8%      |                        | 3.0%      |              | 1.8%      |   |  |
| add_dx_pre5y_noi_cumulative | ADD DX, (0,5] years prior                  |                                | 10.6%     |              | 11.4%     |                        | 5.0%      |              | 7.8%      |   |  |
| add_dx_pre5y                | ADD DX, [1,5] years prior                  |                                | 7.6%      |              | 8.2%      |                        | 3.8%      |              | 6.0%      | x |  |
| asd_dx_pre5y_noi_cumulative | ASD DX, (0,5] years prior                  |                                | 1.1%      |              | 1.5%      |                        | 0.5%      |              | 1.1%      |   |  |
| asd_dx_pre5y                | ASD DX, [1,5] years prior                  |                                | 0.9%      |              | 1.2%      |                        | 0.4%      |              | 0.9%      |   |  |
| per_dx_pre5y_noi_cumulative | Personality disorder DX, (0,5] years prior |                                | 6.1%      |              | 15.3%     |                        | 2.3%      |              | 9.1%      |   |  |
| per_dx_pre5y                | Personality disorder DX, [1,5] years prior |                                | 4.3%      |              | 10.7%     |                        | 1.8%      |              | 7.2%      |   |  |
| alc_dx_pre5y_noi_cumulative | Alcohol use disorder DX, (0,5] years prior |                                | 12.8%     |              | 14.8%     |                        | 6.0%      |              | 11.6%     |   |  |
| alc_dx_pre5y                | Alcohol use disorder DX, [1,5] years prior |                                | 6.7%      |              | 8.6%      |                        | 4.1%      |              | 7.5%      | x |  |
| pts_dx_pre5y_noi_cumulative | PTSD DX, (0,5] years prior                 |                                | 8.5%      |              | 10.0%     |                        | 3.5%      |              | 4.5%      |   |  |
| pts_dx_pre5y                | PTSD DX, [1,5] years prior                 |                                | 5.0%      |              | 5.6%      |                        | 2.4%      |              | 3.1%      |   |  |
| eat_dx_pre5y_noi_cumulative | Eating disorder DX, (0,5] years prior      |                                | 3.4%      |              | 3.7%      |                        | 1.0%      |              | 1.2%      |   |  |
| eat_dx_pre5y                | Eating disorder DX, [1,5] years prior      |                                | 2.1%      |              | 2.2%      |                        | 0.7%      |              | 0.8%      |   |  |
| tbi_dx_pre5y_noi_cumulative | TBI DX, (0,5] years prior                  |                                | 2.7%      |              | 3.5%      |                        | 2.2%      |              | 3.2%      |   |  |
| tbi_dx_pre5y                | TBI DX, [1,5] years prior                  |                                | 1.8%      |              | 2.6%      |                        | 1.5%      |              | 2.3%      |   |  |

(Continued)

Supplementary Material 1 (Continued)

| Predictor                               | Mental health specialty sample |                            |                                   |             | General medical sample     |                            |                                   |             |
|-----------------------------------------|--------------------------------|----------------------------|-----------------------------------|-------------|----------------------------|----------------------------|-----------------------------------|-------------|
|                                         | Original                       | Contemporary               | Included <sup>a</sup> in suicide: |             | Original                   | Contemporary               | Included <sup>a</sup> in suicide: |             |
|                                         | n = 10,275,853<br>Mean or %    | N = 6,832,439<br>Mean or % | Attempt model                     | Death model | N = 9,685,206<br>Mean or % | N = 3,987,078<br>Mean or % | Attempt model                     | Death model |
| Drug use disorder DX, (0,5] years prior | 25.8%                          | 15.7%                      |                                   |             | 16.3%                      | 15.4%                      | x                                 |             |
| Drug use disorder DX, [1,5] years prior | 14.2%                          | 9.3%                       | x                                 |             | 11.6%                      | 10.3%                      | x                                 |             |
| Antidepressant rx (0,3] months          | 44.3%                          | 50.6%                      | x                                 | x           | 29.9%                      | 36.1%                      | x                                 |             |
| Antidepressant rx (0, 1] year           | 54.3%                          | 60.8%                      | x                                 |             | 40.3%                      | 47.5%                      | x                                 |             |
| Antidepressant rx (0, 5] years          | 63.0%                          | 68.9%                      | x                                 |             | 51.8%                      | 58.9%                      |                                   |             |
| Benzo rx (0,3] months                   | 24.4%                          | 23.4%                      | x                                 | x           | 16.9%                      | 17.0%                      | x                                 | x           |
| Benzo rx (0, 1] year                    | 34.3%                          | 33.0%                      | x                                 |             | 25.2%                      | 25.4%                      |                                   |             |
| Benzo rx (0, 5] years                   | 45.8%                          | 45.2%                      | x                                 |             | 37.9%                      | 39.1%                      |                                   |             |
| Hypnotic rx (0,3] months                | 5.0%                           | 3.0%                       | x                                 |             | 3.5%                       | 2.1%                       | x                                 |             |
| Hypnotic rx (0, 1] year                 | 8.1%                           | 4.7%                       | x                                 | x           | 5.8%                       | 3.4%                       |                                   |             |
| Hypnotic rx (0, 5] years                | 13.9%                          | 10.2%                      | x                                 |             | 10.8%                      | 8.5%                       | x                                 |             |
| SGA rx (0,3] months                     | 12.2%                          | 13.3%                      | x                                 |             | 4.5%                       | 4.5%                       |                                   |             |
| SGA rx (0, 1] year                      | 15.8%                          | 17.0%                      | x                                 |             | 6.1%                       | 6.1%                       | x                                 |             |
| SGA rx (0, 5] years                     | 20.0%                          | 21.6%                      | x                                 | x           | 8.7%                       | 8.8%                       | x                                 |             |
| MH Inpatient stay (0, 3] months         | 6.7%                           | 6.7%                       | x                                 | x           | 4.6%                       | 4.7%                       | x                                 | x           |
| MH Inpatient stay (0, 1] year           | 13.2%                          | 12.9%                      | x                                 | x           | 9.8%                       | 9.6%                       | x                                 | x           |
| MH Inpatient stay (0, 5] years          | 24.2%                          | 23.4%                      | x                                 | x           | 20.5%                      | 19.9%                      | x                                 |             |
| MH outpatient utilization (0, 3] months | 79.2%                          | 78.6%                      | x                                 |             | 21.1%                      | 19.1%                      | x                                 |             |
| MH outpatient utilization (0, 1] year   | 87.1%                          | 87.5%                      | x                                 |             | 31.4%                      | 29.9%                      | x                                 |             |
| MH outpatient utilization (0, 5] years  | 91.2%                          | 91.8%                      | x                                 |             | 45.4%                      | 45.9%                      | x                                 |             |

Supplementary Material 1 (Continued)

| Predictor                    | Description                         | Mental health specialty sample |           |              |           | General medical sample |           |              |           | Included <sup>a</sup> in suicide:<br>Death model | Included <sup>b</sup> in suicide:<br>Attempt model | Death model |
|------------------------------|-------------------------------------|--------------------------------|-----------|--------------|-----------|------------------------|-----------|--------------|-----------|--------------------------------------------------|----------------------------------------------------|-------------|
|                              |                                     | Original                       |           | Contemporary |           | Original               |           | Contemporary |           |                                                  |                                                    |             |
|                              |                                     | n                              | Mean or % | N            | Mean or % | N                      | Mean or % | N            | Mean or % |                                                  |                                                    |             |
| mh_ed_pre3m                  | MH ED utilization (0, 3] months     | 10,275,853                     | 10.2 %    | 6,832,439    | 11.8 %    | 9,685,206              | 8.2 %     | 3,987,078    | 9.5 %     | x                                                | x                                                  | x           |
| mh_ed_pre1y_cumulative       | MH ED utilization (0, 1] year       |                                | 20.0 %    |              | 22.5 %    |                        | 16.7 %    |              | 18.2 %    | x                                                | x                                                  | x           |
| mh_ed_pre5y_cumulative       | MH ED utilization (0, 5] years      |                                | 34.2 %    |              | 36.9 %    |                        | 30.7 %    |              | 31.9 %    | x                                                | x                                                  |             |
| any_sui_att_pre3m            | Prior suicide attempt (0, 3] months |                                | 1.2 %     |              | 1.3 %     |                        | 0.3 %     |              | 0.4 %     | x                                                | x                                                  |             |
| any_sui_att_pre1y_cumulative | Prior suicide attempt (0, 1] year   |                                | 2.4 %     |              | 2.5 %     |                        | 0.7 %     |              | 0.9 %     | x                                                | x                                                  |             |
| any_sui_att_pre5y_cumulative | Prior suicide attempt (0, 5] years  |                                | 4.1 %     |              | 4.6 %     |                        | 1.7 %     |              | 2.1 %     | x                                                | x                                                  | x           |
| lvi_sui_att_pre3m            | LVI suicide attempt (0, 3] months   |                                | 0.3 %     |              | 0.3 %     |                        | 0.1 %     |              | 0.1 %     |                                                  |                                                    |             |
| lvi_sui_att_pre1y_cumulative | LVI suicide attempt (0, 1] year     |                                | 0.6 %     |              | 0.6 %     |                        | 0.1 %     |              | 0.2 %     |                                                  |                                                    |             |
| lvi_sui_att_pre5y_cumulative | LVI suicide attempt (0, 5] years    |                                | 1.0 %     |              | 1.2 %     |                        | 0.3 %     |              | 0.4 %     | x                                                | x                                                  |             |
| ovi_sui_att_pre3m            | OVI suicide attempt (0, 3] months   |                                | 0.0 %     |              | 0.0 %     |                        | 0.0 %     |              | 0.0 %     |                                                  |                                                    |             |
| ovi_sui_att_pre1y_cumulative | OVI suicide attempt (0, 1] year     |                                | 0.1 %     |              | 0.1 %     |                        | 0.0 %     |              | 0.0 %     |                                                  |                                                    |             |
| ovi_sui_att_pre5y_cumulative | OVI suicide attempt (0, 5] years    |                                | 0.1 %     |              | 0.1 %     |                        | 0.1 %     |              | 0.1 %     |                                                  |                                                    |             |
| any_inj_poi_pre3m            | Any Inj/Poi DX (0, 3] months        |                                | 11.0 %    |              | 11.7 %    |                        | 10.1 %    |              | 10.6 %    | x                                                | x                                                  |             |
| any_inj_poi_pre1y_cumulative | Any Inj/Poi DX (0, 1] year          |                                | 28.4 %    |              | 30.3 %    |                        | 25.6 %    |              | 27.7 %    | x                                                | x                                                  | x           |
| any_inj_poi_pre5y_cumulative | Any Inj/Poi DX (0, 5] years         |                                | 59.0 %    |              | 63.3 %    |                        | 55.6 %    |              | 58.8 %    | x                                                | x                                                  |             |
| Charlson_score               | Charlson score on index date        |                                | 0.5       |              | 0.6       |                        | 0.8       |              | 0.8       | x                                                | x                                                  | x           |
| Charlson_mi                  | Individual Charlson indicators      |                                | 1.3 %     |              | 1.3 %     |                        | 2.8 %     |              | 2.4 %     |                                                  |                                                    |             |
| Charlson_chd                 | Individual Charlson indicators      |                                | 1.1 %     |              | 1.2 %     |                        | 2.7 %     |              | 2.9 %     |                                                  |                                                    |             |
| Charlson_pvd                 | Individual Charlson indicators      |                                | 0.9 %     |              | 3.7 %     |                        | 2.5 %     |              | 6.1 %     |                                                  |                                                    |             |

(Continued)

Supplementary Material 1 (Continued)

| Predictor       | Description                                   | Mental health specialty sample |                            |               |             | General medical sample     |                            |               |             | Included <sup>a</sup> in suicide: |             |
|-----------------|-----------------------------------------------|--------------------------------|----------------------------|---------------|-------------|----------------------------|----------------------------|---------------|-------------|-----------------------------------|-------------|
|                 |                                               | Original                       | Contemporary               | Attempt model | Death model | Original                   | Contemporary               | Attempt model | Death model | Attempt model                     | Death model |
|                 |                                               | n = 10,275,853<br>Mean or %    | N = 6,832,439<br>Mean or % |               |             | N = 9,685,206<br>Mean or % | N = 3,987,078<br>Mean or % |               |             |                                   |             |
| Charlson_cvd    | Individual Charlson indicators                | 1.6 %                          | 1.7 %                      |               |             | 3.0 %                      | 3.0 %                      |               |             | x                                 |             |
| Charlson_dem    | Individual Charlson indicators                | 0.1 %                          | 0.6 %                      |               |             | 0.2 %                      | 1.2 %                      |               |             |                                   |             |
| Charlson_cpd    | Individual Charlson indicators                | 13.2 %                         | 14.2 %                     | x             |             | 14.8 %                     | 14.9 %                     |               |             |                                   |             |
| Charlson_rhd    | Individual Charlson indicators                | 0.9 %                          | 1.1 %                      |               |             | 1.5 %                      | 1.6 %                      |               |             |                                   |             |
| Charlson_pud    | Individual Charlson indicators                | 0.5 %                          | 0.5 %                      |               |             | 0.6 %                      | 0.7 %                      |               |             |                                   |             |
| Charlson_mlivd  | Individual Charlson indicators                | 0.6 %                          | 0.8 %                      |               |             | 0.7 %                      | 1.0 %                      |               |             |                                   |             |
| Charlson_diab   | Individual Charlson indicators                | 8.1 %                          | 9.4 %                      |               |             | 12.0 %                     | 12.6 %                     |               |             | x                                 |             |
| Charlson_diabc  | Individual Charlson indicators                | 3.7 %                          | 4.4 %                      |               |             | 6.5 %                      | 6.9 %                      |               |             |                                   |             |
| Charlson_plegia | Individual Charlson indicators                | 0.2 %                          | 0.3 %                      |               |             | 0.4 %                      | 0.4 %                      |               |             |                                   |             |
| Charlson_ren    | Individual Charlson indicators                | 3.9 %                          | 4.9 %                      |               |             | 7.3 %                      | 7.5 %                      |               |             |                                   |             |
| Charlson_malign | Individual Charlson indicators                | 2.3 %                          | 2.4 %                      |               |             | 3.5 %                      | 3.4 %                      |               |             |                                   |             |
| Charlson_slivd  | Individual Charlson indicators                | 0.3 %                          | 0.3 %                      |               |             | 0.4 %                      | 0.4 %                      |               |             |                                   |             |
| Charlson_mst    | Individual Charlson indicators                | 0.5 %                          | 0.6 %                      |               |             | 0.8 %                      | 0.8 %                      |               |             |                                   |             |
| Charlson_aids   | Individual Charlson indicators                | 0.3 %                          | 0.3 %                      |               |             | 0.4 %                      | 0.3 %                      |               |             |                                   |             |
| Raceasian       | VDW Race 1 = Asian                            | 4.5 %                          | 5.5 %                      |               | x           | 6.0 %                      | 4.5 %                      |               |             | x                                 | x           |
| Raceblack       | VDW Race 1 = Black                            | 9.0 %                          | 9.2 %                      |               | x           | 8.2 %                      | 8.2 %                      |               |             | x                                 |             |
| Racehp          | VDW Race 1 = HI/PI                            | 1.1 %                          | 1.0 %                      |               | x           | 1.6 %                      | 0.8 %                      |               |             |                                   |             |
| Racein          | VDW Race 1 = Native American / Alaskan Native | 1.0 %                          | 0.9 %                      |               | x           | 1.1 %                      | 1.0 %                      |               |             | x                                 |             |
| Racemuot        | VDW Race 1 = Multiple/other                   | 0.6 %                          | 0.3 %                      |               |             | 0.7 %                      | 0.7 %                      |               |             |                                   | x           |
| Raceun          | VDW Race 1 = Unknown                          | 15.5 %                         | 17.5 %                     |               | x           | 16.3 %                     | 15.0 %                     |               |             | x                                 | x           |
| Racewh          | VDW Race 1 = White                            | 68.3 %                         | 65.6 %                     |               |             | 66.1 %                     | 69.8 %                     |               |             |                                   |             |

Supplementary Material 1 (Continued)

| Predictor      | Description                                              | Mental health specialty sample |                            |                                   |             | General medical sample     |                            |                                   |             |
|----------------|----------------------------------------------------------|--------------------------------|----------------------------|-----------------------------------|-------------|----------------------------|----------------------------|-----------------------------------|-------------|
|                |                                                          | Original                       | Contemporary               | Included <sup>a</sup> in suicide: |             | Original                   | Contemporary               | Included <sup>a</sup> in suicide: |             |
|                |                                                          | n = 10,275,853<br>Mean or %    | N = 6,832,439<br>Mean or % | Attempt model                     | Death model | N = 9,685,206<br>Mean or % | N = 3,987,078<br>Mean or % | Attempt model                     | Death model |
| Hispanic       | VDW Hispanic = Yes                                       | 22.3 %                         | 27.8 %                     |                                   |             | 22.7 %                     | 23.3 %                     |                                   |             |
| census_missing | Census variables observed (0/1)                          | 10.2 %                         | 3.8 %                      | x                                 |             | 9.7 %                      | 15.5 %                     |                                   |             |
| hhld_inc_lt40k | Neighborhood income 40 (<\$40k/>=\$40k)                  | 11.1 %                         | 12.5 %                     |                                   |             | 12.9 %                     | 12.1 %                     |                                   |             |
| coll_deg_lt25p | Neighborhood education (<25% coll grad/>= 25% coll grad) | 39.2 %                         | 44.2 %                     | x                                 |             | 44.0 %                     | 40.8 %                     | x                                 |             |
| phqNumber90    | Total # of PHQs in prior 90 days                         | 0.3                            | 0.7                        | x                                 |             | 0.1                        | 0.2                        | x                                 |             |
| phqMode90_0    | Modal PHQ9 value in prior 90 days = 0                    | 8.4 %                          | 21.3 %                     | x                                 |             | 2.7 %                      | 6.8 %                      |                                   |             |
| phqMode90_1    | Modal PHQ9 value in prior 90 days = 1                    | 2.5 %                          | 6.5 %                      | x                                 |             | 0.6 %                      | 1.6 %                      |                                   |             |
| phqMode90_2    | Modal PHQ9 value in prior 90 days = 2                    | 1.0 %                          | 2.2 %                      | x                                 |             | 0.3 %                      | 0.6 %                      |                                   |             |
| phqMax90_0     | Maximum PHQ9 value in prior 90 days = 0                  | 7.5 %                          | 19.7 %                     |                                   |             | 2.6 %                      | 6.6 %                      |                                   |             |
| phqMax90_1     | Maximum PHQ9 value in prior 90 days = 1                  | 2.7 %                          | 6.9 %                      |                                   |             | 0.7 %                      | 1.7 %                      |                                   |             |
| phqMax90_2     | Maximum PHQ9 value in prior 90 days = 2                  | 1.3 %                          | 2.8 %                      | x                                 |             | 0.3 %                      | 0.6 %                      |                                   |             |
| phqMax90_3     | Maximum PHQ9 value in prior 90 days = 3                  | 1.3 %                          | 2.5 %                      |                                   |             | 0.2 %                      | 0.5 %                      |                                   |             |
| phqNumber183   | Total # of PHQs in prior 183 days                        | 0.5                            | 1.1                        | x                                 |             | 0.1                        | 0.3                        | x                                 |             |
| phqMode183_0   | Modal PHQ9 value in prior 183 days = 0                   | 10.1 %                         | 25.6 %                     |                                   |             | 3.9 %                      | 9.9 %                      |                                   |             |
| phqMode183_1   | Modal PHQ9 value in prior 183 days = 1                   | 2.9 %                          | 7.4 %                      |                                   |             | 0.9 %                      | 2.2 %                      |                                   |             |
| phqMode183_2   | Modal PHQ9 value in prior 183 days = 2                   | 1.2 %                          | 2.4 %                      |                                   |             | 0.3 %                      | 0.7 %                      |                                   |             |
| phqMax183_0    | Maximum PHQ9 value in prior 183 days = 0                 | 8.7 %                          | 22.5 %                     |                                   |             | 3.7 %                      | 9.3 %                      |                                   |             |
| phqMax183_1    | Maximum PHQ9 value in prior 183 days = 1                 | 3.3 %                          | 8.3 %                      | x                                 |             | 1.0 %                      | 2.4 %                      |                                   |             |
| phqMax183_2    | Maximum PHQ9 value in prior 183 days = 2                 | 1.6 %                          | 3.5 %                      |                                   |             | 0.4 %                      | 0.9 %                      |                                   |             |

(Continued)

Supplementary Material 1 (Continued)

|                         | Mental health specialty sample |                  |                                   |             | General medical sample |                  |                                   |             |
|-------------------------|--------------------------------|------------------|-----------------------------------|-------------|------------------------|------------------|-----------------------------------|-------------|
|                         | Original                       | Contemporary     | Included <sup>a</sup> in suicide: |             | Original               | Contemporary     | Included <sup>a</sup> in suicide: |             |
|                         | n = 10,275,853                 | N = 6,832,439    | Attempt model                     | Death model | N = 9,685,206          | N = 3,987,078    | Attempt model                     | Death model |
| <b>Predictor</b>        | <b>Mean or %</b>               | <b>Mean or %</b> |                                   |             | <b>Mean or %</b>       | <b>Mean or %</b> |                                   |             |
| phqMax183_3             | 1.6%                           | 3.3%             |                                   |             | 0.4%                   | 0.8%             |                                   |             |
| phqNumber365            | 0.7                            | 1.7              |                                   |             | 0.2                    | 0.4              | x                                 |             |
| phqMode365_0            | 11.8%                          | 29.1%            |                                   |             | 5.5%                   | 14.0%            |                                   |             |
| phqMode365_1            | 3.2%                           | 8.0%             |                                   |             | 1.2%                   | 2.9%             |                                   |             |
| phqMode365_2            | 1.3%                           | 2.5%             | x                                 |             | 0.4%                   | 0.9%             | x                                 |             |
| phqMax365_0             | 9.7%                           | 24.3%            | x                                 |             | 5.1%                   | 12.8%            | x                                 |             |
| phqMax365_1             | 3.8%                           | 9.3%             |                                   |             | 1.3%                   | 3.3%             | x                                 |             |
| phqMax365_2             | 1.9%                           | 4.2%             | x                                 |             | 0.6%                   | 1.3%             | x                                 |             |
| phqMax365_3             | 2.0%                           | 4.1%             | x                                 |             | 0.5%                   | 1.1%             | x                                 |             |
| dep_dx_pre5y_cumulative | 74.0%                          | 76.8%            | x                                 | x           | 54.5%                  | 65.7%            | x                                 | x           |
| anx_dx_pre5y_cumulative | 61.9%                          | 79.6%            | x                                 | x           | 46.1%                  | 71.4%            | x                                 | x           |
| bip_dx_pre5y_cumulative | 13.3%                          | 12.6%            | x                                 | x           | 5.8%                   | 6.0%             | x                                 | x           |
| sch_dx_pre5y_cumulative | 3.6%                           | 4.3%             | x                                 | x           | 1.7%                   | 1.8%             | x                                 |             |
| oth_dx_pre5y_cumulative | 5.0%                           | 5.9%             | x                                 |             | 2.8%                   | 3.2%             | x                                 |             |
| dem_dx_pre5y_cumulative | 3.8%                           | 1.4%             | x                                 |             | 4.4%                   | 2.9%             | x                                 |             |
| add_dx_pre5y_cumulative | 11.0%                          | 11.8%            | x                                 |             | 5.5%                   | 8.7%             |                                   |             |
| asd_dx_pre5y_cumulative | 1.2%                           | 1.6%             | x                                 |             | 0.5%                   | 1.1%             |                                   |             |
| per_dx_pre5y_cumulative | 6.3%                           | 15.8%            | x                                 |             | 2.3%                   | 9.7%             | x                                 |             |
| alc_dx_pre5y_cumulative | 13.0%                          | 15.2%            | x                                 | x           | 6.3%                   | 12.5%            | x                                 | x           |

Supplementary Material 1 (Continued)

| Predictor               | Description                             | Mental health specialty sample |                            |                                   |             | General medical sample     |                            |                                   |             |
|-------------------------|-----------------------------------------|--------------------------------|----------------------------|-----------------------------------|-------------|----------------------------|----------------------------|-----------------------------------|-------------|
|                         |                                         | Original                       | Contemporary               | Included <sup>a</sup> in suicide: |             | Original                   | Contemporary               | Included <sup>a</sup> in suicide: |             |
|                         |                                         | n = 10,275,853<br>Mean or %    | N = 6,832,439<br>Mean or % | Attempt model                     | Death model | N = 9,685,206<br>Mean or % | N = 3,987,078<br>Mean or % | Attempt model                     | Death model |
| dru_dx_pre5y_cumulative | Drug use disorder DX, [0,5] years prior | 26.4%                          | 16.1%                      | x                                 |             | 17.1%                      | 16.3%                      | x                                 |             |
| pts_dx_pre5y_cumulative | PTSD DX, [0,5] years prior              | 8.9%                           | 10.4%                      | x                                 |             | 3.7%                       | 4.8%                       | x                                 |             |
| eat_dx_pre5y_cumulative | Eating disorder DX, [0,5] years prior   | 3.4%                           | 3.8%                       | x                                 |             | 1.0%                       | 1.2%                       | x                                 |             |
| tbi_dx_pre5y_cumulative | TBI DX, [0,5] years prior               | 2.7%                           | 3.5%                       |                                   |             | 2.2%                       | 3.2%                       | x                                 |             |
| phq8_index_score_calc   | PHQ8 total score                        | 0.9                            | 2.3                        | x                                 |             | 0.5                        | 1.4                        | x                                 | x           |
| phq8_missing            | PHQ8 missing at visit (1 if missing)    | 90.8%                          | 78.0%                      |                                   |             | 94.9%                      | 84.8%                      |                                   |             |
| q9_0                    | PHQ9 = 0 at index visit                 | 7.2%                           | 17.3%                      | x                                 |             | 3.9%                       | 10.1%                      | x                                 |             |
| q9_1                    | PHQ9 = 1 at index visit                 | 1.7%                           | 3.8%                       | x                                 |             | 0.7%                       | 1.6%                       | x                                 | x           |
| q9_2                    | PHQ9 = 2 at index visit                 | 0.6%                           | 1.1%                       | x                                 |             | 0.2%                       | 0.5%                       | x                                 | x           |
| q9_3                    | PHQ9 = 3 at index visit                 | 0.4%                           | 0.8%                       | x                                 |             | 0.1%                       | 0.3%                       | x                                 | x           |

<sup>a</sup>These show which predictors were selected (either as a main effect or within an interaction term) for final inclusion in the published models. Note: These are the candidate predictors (interactions not shown) that were included in variable selection models during development of the previously published models.
